# Supplementary material for: Identification and validation of the pathways and functions regulated by the orphan nuclear receptor, ROR alpha1, in skeletal muscle
Source: PubMed Central journal article supplement — Nucleic Acids Res. 2010 Mar 24;38(13):4296–312. doi: 10.1093/nar/gkq180 (PMC2910057; doi:10.1093/nar/gkq180), 2010-03-24
Supplement: gkq180_1.pdf [file gkq180_1.pdf]

## S1: Description of microarray experiment and analysis

RNA was extracted from quadriceps muscle from three male *sg/sg* mice and their wild type littermates using TRI-Reagent (Sigma-Aldrich, St. Louis, MO) and RNeasy mini kit (Qiagen, Hilden, Germany) according to the manufacturers' protocol. Total skeletal muscle RNA was assessed for integrity using the Agilent Bioanalyzer 2100 and RNA integrity (RIN) scores above 8.4 were present in all samples. 500ng of RNA was amplified using the Illumina TotalPrep RNA Amplification kit (Ambion, Austin, TX) with an *in vitro* transcription reaction period of 12 hours. Biotinylated, amplified cRNA was assessed for quantity and quality also using the Agilent Bioanalyzer 2100. 1500 ng per array of amplified cRNA was hybridized to Mouse-6.v1 BeadChip arrays (Illumina, San Diego, CA) according to manufacturer directions. Hybridized BeadChip arrays were stained with Amersham fluorolink streptavidin-Cy3 (GE Healthcare, Pittsburgh, PA). BeadChip arrays were scanned with Illumina BeadStation Scanner and data values with detection scores were compiled using BeadStudio v1.5 (Illumina) and imported into GeneSpring GX v10 (Agilent, Santa Clara CA) for data analysis. Mouse Illumina probe set was defined in the GeneSpring Workgroup using the Illumina targetIDs as the unique identifiers and annotated according to array content files supplied by Illumina. All probes values less than 0.01 were set to 0.01. Data was normalized by first applying normalization to the median and per chip normalization to the 50th percentile. Samples were grouped as wild type and Tg-ROR $\alpha$ 1 $\Delta$ DE. Statistical analysis was performed using a parametric Welch's t-test (where variances were not assumed equal) with a p-value cutoff of 0.05. Multiple testing corrections were applied to reduce false positives using Benjamini and Hochberg False Discovery Rate.

S2 – Table of all significantly regulated genes in Tg-ROR $\alpha$ 1 $\Delta$ DE mice

| Symbol        | Gene Name                                                                   | Fold change | Direction | p-value | Accession   |
|---------------|-----------------------------------------------------------------------------|-------------|-----------|---------|-------------|
| Ucp1          | Uncoupling protein 1                                                        | 34.89       | Down      | 0.000   | NM_009463.2 |
| Fasn          | Fatty acid synthase                                                         | 8.96        | Down      | 0.001   | NM_007988.3 |
| Cidea         | Cell death-inducing DNA fragmentation factor, alpha subunit-like effector A | 8.58        | Down      | 0.000   | NM_007702.1 |
| A830080H07Rik | RIKEN cdna A830080H07Rik gene                                               | 6.31        | Up        | 0.000   |             |
| 8430408G22Rik | RIKEN cdna 8430408G22 gene                                                  | 6.03        | Down      | 0.007   | NM_145980.1 |
| Scd1          | Stearoyl-Coenzyme A desaturase 1                                            | 5.47        | Down      | 0.004   | NM_009127.3 |
| LOC670615     | PREDICTED: similar to alpha-2u globulin PGCL3                               | 5.03        | Down      | 0.003   | XM_982323.1 |
| Hp            | Haptoglobin                                                                 | 4.22        | Down      | 0.004   | NM_017370.1 |
| Prkar2b       | Protein kinase, camp dependent regulatory, type II beta                     | 4.06        | Down      | 0.004   | NM_011158.3 |
| 2210013O21Rik | PREDICTED: RIKEN cdna 2210013O21 gene                                       | 3.28        | Down      | 0.000   | XM_982708.1 |
| Apoc1         | Apolipoprotein C-I                                                          | 3.11        | Down      | 0.006   | NM_007469.2 |
| Igh-6         | Immunoglobulin heavy chain 6 (heavy chain of IgM)                           | 2.93        | Down      | 0.014   | XM_354710.1 |
| Fah           | Fumarylacetoacetate hydrolase                                               | 2.72        | Down      | 0.008   | NM_010176.1 |
| Zranb3        | Zinc finger, RAN-binding domain containing 3                                | 2.64        | Up        | 0.000   | NM_172642.1 |
| Tmem45b       | Transmembrane protein 45b                                                   | 2.62        | Down      | 0.000   | NM_144936.1 |
| Rom1          | Rod outer segment membrane protein 1                                        | 2.54        | Up        | 0.000   | NM_009073.2 |
| Elovl6        | ELOVL family member 6, elongation of long chain fatty acids                 | 2.47        | Down      | 0.000   | NM_130450.2 |
| Myo1e         | Myosin IE                                                                   | 2.43        | Down      | 0.010   | NM_181072.3 |
| Tceal5        | Transcription elongation factor A (SII)-like 5                              | 2.43        | Up        | 0.001   | NM_177919.1 |
| A130092J06Rik | RIKEN cdna A130092J06 gene                                                  | 2.28        | Up        | 0.005   | NM_175511.2 |
| Col7a1        | Procollagen, type VII, alpha 1                                              | 2.21        | Up        | 0.010   | NM_007738.3 |
| Ces3          | Carboxylesterase 3                                                          | 2.21        | Down      | 0.001   | NM_053200.2 |
| A130038J17Rik | RIKEN cdna A130038J17Rik gene                                               | 2.11        | Down      | 0.005   |             |
| Sfxn1         | Sideroflexin 1                                                              | 2.11        | Down      | 0.013   | NM_027324.2 |
| Plekhb1       | Pleckstrin homology domain containing, family B (evectins) member 1         | 2.10        | Up        | 0.001   | NM_013746.1 |
| Tnfrsf22      | Tumor necrosis factor receptor superfamily, member 22                       | 2.10        | Up        | 0.001   | NM_023680.2 |
| BC048679      | Cdna sequence BC048679                                                      | 2.08        | Down      | 0.011   | NM_183143.1 |
| Acaca         | Acetyl-Coenzyme A carboxylase alpha                                         | 2.02        | Down      | 0.002   | NM_133360.2 |
| Rab15         | RAB15, member RAS oncogene family                                           | 2.00        | Down      | 0.008   | NM_134050.2 |
| 2310040G24Rik | RIKEN cdna 2310040G24Rik gene                                               | 2.00        | Up        | 0.002   | XM_149767.1 |
| Cox6a1        | Cytochrome c oxidase, subunit VI a, polypeptide 1                           | 2.00        | Down      | 0.000   | NM_007748.3 |
| Tkt           | Transketolase                                                               | 1.97        | Down      | 0.004   | NM_009388.2 |
| 1810005K13Rik | RIKEN cdna 1810005K13Rik gene                                               | 1.96        | Down      | 0.000   |             |
| Tnfrsf22      | Tumor necrosis factor receptor superfamily, member 22                       | 1.94        | Up        | 0.001   | NM_023680   |
| Fgfbp1        | Fibroblast growth factor binding protein 1                                  | 1.90        | Down      | 0.006   | NM_008009.3 |
| 7330410H16Rik | RIKEN cdna 7330410H16Rik gene                                               | 1.90        | Down      | 0.011   |             |
| Thrsp         | Thyroid hormone responsive SPOT14 homolog                                   | 1.90        | Down      | 0.006   | NM_009381.2 |
| Gfer          | Growth factor, erv1 (S. Cerevisiae)-like (augmenter of liver regeneration)  | 1.90        | Up        | 0.000   | NM_023040.3 |
| Sfxn1         | Sideroflexin 1                                                              | 1.90        | Down      | 0.010   | NM_027324.2 |
| 2810423O19Rik | RIKEN cdna 2810423O19Rik gene                                               | 1.88        | Down      | 0.001   | NM_026447   |

|                |                                                                                              |      |      |       |                |
|----------------|----------------------------------------------------------------------------------------------|------|------|-------|----------------|
| Cox6a1         | Cytochrome c oxidase, subunit VI a, polypeptide 1                                            | 1.86 | Down | 0.000 | NM_007748.3    |
| BC054059       | Cdna sequence BC054059                                                                       | 1.85 | Down | 0.000 | NM_145635.2    |
| D12Ert647e     | DNA segment, Chr 12, ERATO Doi 647, expressed, transcript variant 4                          | 1.85 | Down | 0.006 | NM_194068.1    |
| Agpat2         | 1-acylglycerol-3-phosphate O-acyltransferase 2 (lysophosphatidic acid acyltransferase, beta) | 1.84 | Down | 0.000 | NM_026212.1    |
| Pygl           | Liver glycogen phosphorylase                                                                 | 1.84 | Down | 0.000 | NM_133198.1    |
| 2510002J07Rik  | RIKEN cdna 2510002J07Rik gene                                                                | 1.84 | Down | 0.005 | AK002422       |
| Ehhadh         | Enoyl-Coenzyme A, hydratase/3-hydroxyacyl Coenzyme A dehydrogenase                           | 1.83 | Down | 0.007 | NM_023737.2    |
| scl0015365.1_6 | Cdna sequence scl0015365.1_6                                                                 | 1.83 | Up   | 0.000 | BC064076.1     |
| Aoc3           | Amine oxidase, copper containing 3                                                           | 1.81 | Down | 0.012 | NM_009675.1    |
| M6prbp1        | Mannose-6-phosphate receptor binding protein 1                                               | 1.81 | Down | 0.003 | NM_025836.1    |
| Tob1           | Transducer of erbb-2.1                                                                       | 1.79 | Up   | 0.011 | NM_009427.2    |
| ldh1           | Isocitrate dehydrogenase 1 (NADP+), soluble                                                  | 1.79 | Down | 0.007 | NM_010497.2    |
| Stab2          | Stabilin 2                                                                                   | 1.79 | Up   | 0.001 | NM_138673.1    |
| Atp1b4         | Atpase, (Na+)/K+ transporting, beta 4 polypeptide                                            | 1.78 | Down | 0.000 | NM_133690.2    |
| Exod1          | Exonuclease domain containing 1                                                              | 1.77 | Down | 0.012 | NM_027698.3    |
| Camk2n2        | PREDICTED: calcium/calmodulin-dependent protein kinase II inhibitor 2                        | 1.77 | Up   | 0.003 | XM_993468.1    |
| 2810416G20Rik  | RIKEN cdna 2810416G20Rik gene                                                                | 1.77 | Down | 0.001 | XM_487719      |
| Hsd17b12       | Hydroxysteroid (17-beta) dehydrogenase 12                                                    | 1.76 | Down | 0.002 | NM_019657.2    |
| Wnt4           | Wingless-related MMTV integration site 4                                                     | 1.76 | Down | 0.004 | NM_009523.1    |
| Cebpa          | CCAAT/enhancer binding protein                                                               | 1.75 | Down | 0.005 | NM_007678.2    |
| Slc27a2        | Solute carrier family 27 (fatty acid transporter), member 2                                  | 1.73 | Down | 0.009 | NM_011978.2    |
| 7330410H16Rik  | RIKEN cdna 7330410H16Rik gene                                                                | 1.72 | Down | 0.007 |                |
| Apoc1          | Apolipoprotein C-I                                                                           | 1.72 | Down | 0.013 | NM_007469.2    |
| Il17re         | Interleukin 17 receptor E, transcript variant 2                                              | 1.71 | Up   | 0.001 | NM_001034029.1 |
| Tmcc3          | Transmembrane and coiled coil domains 3                                                      | 1.71 | Down | 0.004 | NM_172051.2    |
| Zfp691         | Zinc finger protein 691                                                                      | 1.71 | Down | 0.000 | NM_183140.1    |
| Olfm1          | Olfactomedin 1, transcript variant 2                                                         | 1.68 | Down | 0.010 | NM_001038612.1 |
| Gnao1          | Guanine nucleotide binding protein, alpha o                                                  | 1.68 | Down | 0.007 | NM_010308.3    |
| Gcat           | Glycine C-acetyltransferase (2-amino-3-ketobutyrate coenzyme A ligase)                       | 1.67 | Down | 0.012 | NM_013847      |
| BC013481       | Cdna sequence BC013481                                                                       | 1.66 | Down | 0.012 | NM_139065.1    |
| 3110023G01Rik  | RIKEN cdna 3110023G01Rik gene                                                                | 1.65 | Up   | 0.006 | AK014074       |
| Abhd8          | Abhydrolase domain containing 8                                                              | 1.64 | Down | 0.005 | NM_022419.1    |
| Pparg          | Peroxisome proliferator activated receptor gamma                                             | 1.64 | Down | 0.001 | NM_011146.1    |
| A730009E18Rik  | RIKEN cdna A730009E18Rik gene                                                                | 1.64 | Up   | 0.004 |                |
| Cox8a          | Cytochrome c oxidase, subunit viiia                                                          | 1.63 | Down | 0.001 | NM_007750.2    |
| Tspo           | Translocator protein                                                                         | 1.62 | Down | 0.001 | NM_009775.2    |
| Lrtm1          | Leucine-rich repeats and transmembrane domains 1                                             | 1.62 | Down | 0.001 | NM_176920.2    |
| Igh-1a         | Immunoglobulin heavy chain 1a                                                                | 1.62 | Down | 0.002 | XM_354704.1    |
| Slc16a10       | Solute carrier family 16 (monocarboxylic acid transporters), member 10                       | 1.62 | Down | 0.001 | NM_028247.1    |
| Lgals1         | Lectin, galactose binding, soluble 1                                                         | 1.61 | Up   | 0.000 | NM_008495.2    |
| Slc22a4        | Solute carrier family 22 (organic cation transporter), member 4                              | 1.61 | Up   | 0.007 | NM_019687.3    |
| Tspo           | Translocator protein                                                                         | 1.60 | Down | 0.003 | NM_009775.2    |

**SUPPLEMENTARY FIGURES FROM "Identification and validation of the pathways and functions regulated by the orphan nuclear receptor, ROR alpha, in skeletal muscle." S Raichur *et al***

|               |                                                                                          |      |      |       |                |
|---------------|------------------------------------------------------------------------------------------|------|------|-------|----------------|
| Hsd11b1       | Hydroxysteroid 11-beta dehydrogenase 1, transcript variant 2                             | 1.60 | Down | 0.001 | NM_001044751.1 |
| Slc25a30      | Solute carrier family 25, member 30                                                      | 1.60 | Down | 0.001 | NM_026232      |
| Htra4         | PREDICTED: htra serine peptidase 4                                                       | 1.60 | Down | 0.008 | XM_911236.2    |
| Ush1c         | Usher syndrome 1C homolog, transcript variant a1                                         | 1.59 | Up   | 0.008 | NM_023649.1    |
| Hp            | Haptoglobin                                                                              | 1.59 | Down | 0.007 | NM_017370.1    |
| Cd1d1         | CD1d1 antigen                                                                            | 1.59 | Down | 0.000 | NM_007639.1    |
| B930041F14Rik | RIKEN cdna B930041F14 gene                                                               | 1.59 | Up   | 0.002 | NM_178699.3    |
| EG433923      | Predicted gene, EG433923                                                                 | 1.57 | Down | 0.003 | NM_001081233.1 |
| Ppp1r1a       | Protein phosphatase 1, regulatory (inhibitor) subunit 1A                                 | 1.57 | Down | 0.008 | NM_021391.3    |
| Exoc7         | Exocyst complex component 7                                                              | 1.57 | Down | 0.014 | NM_016857      |
| Arhgap26      | Rho gtpase activating protein 26                                                         | 1.56 | Down | 0.001 | NM_175164.4    |
| Maged2        | Melanoma antigen, family D, 2                                                            | 1.55 | Up   | 0.003 | NM_030700.1    |
| Atf5          | Activating transcription factor 5                                                        | 1.55 | Down | 0.009 | NM_030693.1    |
| Vldlr         | Very low density lipoprotein receptor                                                    | 1.55 | Down | 0.012 | NM_013703.1    |
| Mrap          | Melanocortin 2 receptor accessory protein                                                | 1.54 | Down | 0.001 | NM_029844.1    |
| Mif           | Macrophage migration inhibitory factor                                                   | 1.54 | Down | 0.009 | NM_010798.1    |
| C030044C12Rik | RIKEN cdna C030044C12Rik gene                                                            | 1.53 | Up   | 0.014 |                |
| Idh3b         | Isocitrate dehydrogenase 3 (NAD+) beta                                                   | 1.53 | Down | 0.007 | NM_130884.1    |
| Cdk5rap1      | CDK5 regulatory subunit associated protein 1                                             | 1.53 | Down | 0.010 | NM_025876.2    |
| LOC673040     | PREDICTED: similar to La-related protein 4 (La ribonucleoprotein domain family member 4) | 1.53 | Down | 0.004 | XM_001003792.1 |
| 4931406C07Rik | RIKEN cdna 4931406C07 gene                                                               | 1.53 | Down | 0.004 | NM_133732.2    |
| Ibrdc2        | IBR domain containing 2                                                                  | 1.52 | Down | 0.015 | NM_146042      |
| 0610007N19Rik | RIKEN cdna 0610007N19Rik gene                                                            | 1.52 | Down | 0.000 | AK007719       |
| 1700037H04Rik | RIKEN cdna 1700037H04 gene                                                               | 1.52 | Down | 0.013 | NM_026091.1    |
| Ociad2        | OClA domain containing 2                                                                 | 1.52 | Down | 0.009 | NM_026950.3    |
| Gdf11         | Growth differentiation factor 11                                                         | 1.52 | Up   | 0.007 | NM_010272.1    |
| 1110059G02Rik | RIKEN cdna 1110059G02Rik gene                                                            | 1.51 | Up   | 0.011 |                |
| 5430432N15Rik | RIKEN cdna 5430432N15Rik gene                                                            | 1.51 | Up   | 0.000 | NM_172418.1    |
| Ras11b        | RAS-like, family 11, member B                                                            | 1.50 | Down | 0.009 | NM_026878.1    |
| Sfxn3         | Sideroflexin 3                                                                           | 1.50 | Up   | 0.010 | NM_053197.2    |
| Rab11fip5     | RAB11 family interacting protein 5 (class I), transcript variant 2                       | 1.50 | Up   | 0.009 | NM_177466.4    |
| Synpo2l       | Synaptopodin 2-like                                                                      | 1.50 | Up   | 0.008 | NM_175132.3    |
| 5730472N09Rik | RIKEN cdna 5730472N09 gene                                                               | 1.50 | Down | 0.012 | NM_175392.3    |
| Hes1          | Hairy and enhancer of split 1                                                            | 1.49 | Up   | 0.001 | NM_008235.2    |
| 9630055N22Rik | PREDICTED: RIKEN cdna 9630055N22 gene, transcript variant 3                              | 1.49 | Down | 0.010 | XM_900121.2    |
| Adfp          | Adipose differentiation related protein                                                  | 1.48 | Down | 0.001 | NM_007408.3    |
| LOC669042     | PREDICTED: similar to zinc finger protein EZ1, transcript variant 3                      | 1.48 | Down | 0.001 | XM_972708.1    |
| Csnk1e        | Casein kinase 1, epsilon                                                                 | 1.48 | Down | 0.010 | NM_013767.3    |
| Uros          | Uroporphyrinogen III synthase                                                            | 1.48 | Down | 0.013 | NM_009479.2    |
| 1200004M23Rik | RIKEN cdna 1200004M23 gene                                                               | 1.47 | Down | 0.002 | NM_026169.3    |
| Actr1b        | ARP1 actin-related protein 1 homolog B, centractin beta (yeast)                          | 1.47 | Up   | 0.001 | NM_146107      |
| 2810008M24Rik | RIKEN cdna 2810008M24 gene                                                               | 1.47 | Down | 0.007 | NM_001048250.1 |
| Actr1b        | ARP1 actin-related protein 1 homolog B                                                   | 1.47 | Up   | 0.007 | NM_146107.2    |
| Rala          | V-ral simian leukemia viral oncogene homolog A (ras related)                             | 1.47 | Up   | 0.004 | NM_019491.5    |
| BC034902      | cDNA sequence BC034902                                                                   | 1.46 | Down | 0.002 | NM_177654.2    |
| Sms           | Spermine synthase                                                                        | 1.46 | Up   | 0.000 | NM_009214.3    |
| Got2          | Glutamate oxaloacetate transaminase 2, mitochondrial                                     | 1.46 | Down | 0.001 | NM_010325.1    |

**SUPPLEMENTARY FIGURES FROM "Identification and validation of the pathways and functions regulated by the orphan nuclear receptor, ROR alpha, in skeletal muscle." S Raichur *et al***

|                 |                                                                                             |      |      |       |                |
|-----------------|---------------------------------------------------------------------------------------------|------|------|-------|----------------|
| Cdk5rap1        | CDK5 regulatory subunit associated protein 1                                                | 1.46 | Down | 0.002 | NM_025876.2    |
| Hsd11b1         | Hydroxysteroid 11-beta dehydrogenase 1, transcript variant 2                                | 1.46 | Down | 0.008 | NM_001044751.1 |
| AW548124        | PREDICTED: expressed sequence AW548124                                                      | 1.46 | Up   | 0.002 | XM_916849.2    |
| Ephx2           | Epoxide hydrolase 2, cytoplasmic                                                            | 1.46 | Down | 0.002 | NM_007940.3    |
| Gca             | Grancalcin                                                                                  | 1.46 | Down | 0.004 | NM_145523.2    |
| 8430403J19Rik   | RIKEN cdna 8430403J19Rik gene                                                               | 1.46 | Down | 0.005 | AK033358       |
| 5730409N16Rik   | RIKEN cdna 5730409N16Rik gene                                                               | 1.46 | Down | 0.006 |                |
| Pfkl            | Phosphofructokinase, liver, B-type                                                          | 1.45 | Down | 0.002 | NM_008826.2    |
| EG432436        | Predicted gene, EG432436                                                                    | 1.45 | Down | 0.008 | NM_001004162.1 |
| Gstm2           | Glutathione S-transferase, mu 2                                                             | 1.45 | Down | 0.010 | NM_008183.2    |
| LOC208080       | cDNA sequence LOC208080                                                                     | 1.45 | Up   | 0.001 | XM_146931.2    |
| Trio            | PREDICTED: triple functional domain (PTPRF interacting), transcript variant 1               | 1.45 | Down | 0.005 | XM_888341.2    |
| Cdh13           | Cadherin 13                                                                                 | 1.44 | Down | 0.007 | NM_019707.2    |
| Ptplb           | Protein tyrosine phosphatase-like (proline instead of catalytic arginine), member b         | 1.44 | Down | 0.004 | NM_023587      |
| 4930430F08Rik   | RIKEN cdna 4930430F08 gene                                                                  | 1.44 | Down | 0.010 | NM_175128.1    |
| C1qtnf4         | C1q and tumor necrosis factor related protein 4                                             | 1.44 | Up   | 0.006 | NM_026161.1    |
| Car14           | Carbonic anhydrase 14                                                                       | 1.43 | Down | 0.010 | AK009805       |
| LOC385505       | cDNA sequence LOC385505                                                                     | 1.43 | Down | 0.011 | XM_358255.1    |
| C920006O11Rik   | RIKEN cdna C920006O11Rik gene                                                               | 1.43 | Down | 0.007 | XM_489286      |
| Tbc1d1          | TBC1 domain family, member 1                                                                | 1.43 | Down | 0.000 | NM_019636.2    |
| Nudt8           | Nudix (nucleoside diphosphate linked moiety X)-type motif 8                                 | 1.43 | Down | 0.011 | NM_025529.2    |
| Akt2            | Thymoma viral proto-oncogene 2                                                              | 1.43 | Down | 0.005 | NM_007434.2    |
| Csnk1e          | Casein kinase 1, epsilon                                                                    | 1.42 | Down | 0.004 | NM_013767.3    |
| Sorl1           | Sortilin-related receptor containing LDLR class A repeats                                   | 1.42 | Up   | 0.009 | NM_011436      |
| Des             | Desmin                                                                                      | 1.42 | Up   | 0.004 | NM_010043.1    |
| Pter            | Phosphotriesterase related                                                                  | 1.41 | Down | 0.003 | NM_008961.2    |
| Acsf5           | Acyl-coa synthetase long-chain family member 5                                              | 1.41 | Down | 0.007 | NM_027976.2    |
| 1700052O22Rik   | RIKEN cdna 1700052O22Rik gene                                                               | 1.41 | Down | 0.000 |                |
| Slc25a5         | Solute carrier family 25 (mitochondrial carrier, adenine nucleotide translocator), member 5 | 1.40 | Down | 0.005 | NM_007451.2    |
| LOC383153       | cDNA sequence LOC383153                                                                     | 1.40 | Down | 0.011 | XM_356899.1    |
| LOC625421       | PREDICTED: similar to zinc finger protein 570                                               | 1.40 | Down | 0.001 | XM_889991.2    |
| Nans            | N-acetylneuraminic acid synthase (sialic acid synthase)                                     | 1.40 | Up   | 0.002 | NM_053179.2    |
| Zc3h13          | Zinc finger CCCH type containing 13                                                         | 1.40 | Down | 0.004 | NM_026083.2    |
| Ccl25           | Chemokine (C-C motif) ligand 25                                                             | 1.40 | Up   | 0.002 | NM_009138.1    |
| LOC669267       | PREDICTED: similar to calcium/calmodulin-dependent protein kinase I                         | 1.39 | Up   | 0.000 | XM_974106.1    |
| LOC666756       | PREDICTED: similar to Polyadenylate-binding protein 1                                       | 1.39 | Down | 0.002 | XR_001916.1    |
| Csad            | Cysteine sulfinic acid decarboxylase                                                        | 1.39 | Down | 0.009 | NM_144942      |
| Pdhb            | Pyruvate dehydrogenase (lipoamide) beta                                                     | 1.39 | Down | 0.009 | AK084507       |
| Chst1           | Carbohydrate keratan sulfate Gal-6) sulfotransferase 1                                      | 1.39 | Down | 0.010 | NM_023850.1    |
| Rrm1            | Ribonucleotide reductase M1                                                                 | 1.39 | Up   | 0.002 | NM_009103      |
| Eif1ay          | Eukaryotic translation initiation factor 1A, Y-linked                                       | 1.39 | Up   | 0.012 | NM_025437      |
| Wipi1           | WD repeat domain, phosphoinositide interacting 1                                            | 1.39 | Down | 0.002 | NM_145940.2    |
| scl0001483.1_25 | cDNA sequence scl0001483.1_25                                                               | 1.39 | Down | 0.007 |                |

**SUPPLEMENTARY FIGURES FROM "Identification and validation of the pathways and functions regulated by the orphan nuclear receptor, ROR alpha, in skeletal muscle." S Raichur *et al***

|               |                                                                                                          |      |      |       |                |
|---------------|----------------------------------------------------------------------------------------------------------|------|------|-------|----------------|
| BC039632      | PREDICTED: cDNA sequence BC039632                                                                        | 1.39 | Up   | 0.004 | XM_986159.1    |
| Pcp2          | Purkinje cell protein 2                                                                                  | 1.38 | Down | 0.006 | AK013674       |
| Cebpg         | CCAAT/enhancer binding protein                                                                           | 1.38 | Down | 0.005 | NM_009884.2    |
| 2310004I03Rik | RIKEN cDNA 2310004I03Rik gene                                                                            | 1.38 | Down | 0.003 |                |
| E030030I06Rik | PREDICTED: RIKEN cDNA E030030I06 gene, transcript variant 4                                              | 1.38 | Down | 0.001 | XM_912802.2    |
| Txnip         | Thioredoxin interacting protein, transcript variant 1                                                    | 1.38 | Down | 0.006 | NM_001009935.2 |
| Igh-1a        | Immunoglobulin heavy chain 1a                                                                            | 1.38 | Down | 0.013 | XM_354704.1    |
| A530082L16Rik | RIKEN cDNA A530082L16Rik gene                                                                            | 1.38 | Down | 0.012 | AK080217       |
| Setd8         | SET domain containing (lysine methyltransferase) 8                                                       | 1.38 | Up   | 0.007 | NM_030241.2    |
| 5031439G07Rik | RIKEN cDNA 5031439G07Rik gene                                                                            | 1.37 | Down | 0.013 | XM_128281      |
| MGC5739       | PREDICTED: similar to hypothetical protein FLJ20010                                                      | 1.37 | Down | 0.003 | XM_917134.2    |
| Igfbp5        | Insulin-like growth factor binding protein 5                                                             | 1.37 | Up   | 0.000 | NM_010518      |
| E130309L16Rik | RIKEN cDNA E130309L16Rik gene                                                                            | 1.37 | Down | 0.006 | AK053808       |
| D430041D05Rik | RIKEN cDNA D430041D05 gene                                                                               | 1.37 | Up   | 0.004 | NM_001033347.2 |
| LOC381490     | cDNA sequence LOC381490                                                                                  | 1.37 | Down | 0.007 | XM_355443.1    |
| 2310007H09Rik | RIKEN cDNA 2310007H09 gene                                                                               | 1.37 | Down | 0.007 | NM_029609.1    |
| LOC673040     | PREDICTED: similar to La-related protein 4 (La ribonucleoprotein domain family member 4)                 | 1.37 | Down | 0.009 | XM_001003792.1 |
| Rpl10a        | Ribosomal protein L10A                                                                                   | 1.37 | Down | 0.005 | NM_011287.1    |
| 2610200G18Rik | RIKEN cDNA 2610200G18 gene                                                                               | 1.37 | Up   | 0.007 | NM_025998.1    |
| 2610042G18Rik | RIKEN cDNA 2610042G18Rik gene                                                                            | 1.37 | Down | 0.004 |                |
| Irak1         | Interleukin-1 receptor-associated kinase 1                                                               | 1.36 | Down | 0.004 | NM_008363.2    |
| Mllt3         | Myeloid/lymphoid or mixed lineage-leukemia translocation to 3 homolog (Drosophila), transcript variant 2 | 1.36 | Up   | 0.008 | NM_029931.2    |
| Uck1          | Uridine-cytidine kinase 1                                                                                | 1.36 | Down | 0.004 | NM_011675.1    |
| Rcl1          | RNA terminal phosphate cyclase-like 1                                                                    | 1.36 | Down | 0.002 | NM_021525.2    |
| E330018D03Rik | RIKEN cDNA E330018D03 gene                                                                               | 1.36 | Down | 0.009 | NM_177133.1    |
| C530036F05Rik | RIKEN cDNA C530036F05Rik gene                                                                            | 1.36 | Down | 0.015 |                |
| Rod1          | Regulator of differentiation 1                                                                           | 1.36 | Down | 0.010 | NM_144904      |
| D030011M22Rik | RIKEN cDNA D030011M22Rik gene                                                                            | 1.36 | Down | 0.004 | AK050726       |
| Cmtm7         | CKLF-like MARVEL transmembrane domain containing 7                                                       | 1.36 | Down | 0.003 | NM_133978.1    |
| Zbtb12        | Zinc finger and BTB domain containing 12                                                                 | 1.35 | Up   | 0.012 | NM_198886.2    |
| Spr           | Sepiapterin reductase                                                                                    | 1.35 | Down | 0.006 | NM_011467.1    |
| Kcnj11        | Potassium inwardly-rectifying channel, subfamily J, member 11                                            | 1.35 | Down | 0.001 | NM_010602      |
| 2310040C09Rik | RIKEN cDNA 2310040C09 gene                                                                               | 1.35 | Down | 0.010 | NM_178618.3    |
| Tug1          | Taurine upregulated gene 1                                                                               | 1.35 | Down | 0.007 | NR_002322.1    |
| 2310007A19Rik | RIKEN cDNA 2310007A19 gene                                                                               | 1.35 | Up   | 0.001 | NM_025506.2    |
| Smarcd3       | SWI/SNF related, matrix associated, actin dependent regulator of chromatin, subfamily d, member 3        | 1.35 | Up   | 0.006 | NM_025891.3    |
| Hdac4         | Histone deacetylase 4                                                                                    | 1.35 | Up   | 0.000 | NM_207225.1    |
| Eif3s2        | Eukaryotic translation initiation factor 3, subunit 2 (beta)                                             | 1.35 | Up   | 0.002 | NM_018799.1    |
| Mical3        | Microtubule associated monooxygenase, calponin and LIM domain containing 3                               | 1.34 | Down | 0.011 | NM_153396.1    |
| Hectd2        | HECT domain containing 2                                                                                 | 1.34 | Down | 0.001 | NM_172637.1    |
| St3gal2       | ST3 beta-galactoside alpha-2,3-sialyltransferase 2, transcript variant 2                                 | 1.34 | Up   | 0.006 | NM_178048.2    |
| Ccdc25        | Coiled-coil domain containing 25                                                                         | 1.34 | Down | 0.003 | NM_145944.4    |
| Slc25a15      | Solute carrier family 25 (mitochondrial carrier ornithine transporter), member 15                        | 1.34 | Up   | 0.000 | NM_181325.2    |

**SUPPLEMENTARY FIGURES FROM "Identification and validation of the pathways and functions regulated by the orphan nuclear receptor, ROR alpha, in skeletal muscle." S Raichur *et al***

|               |                                                                                           |      |      |       |                |
|---------------|-------------------------------------------------------------------------------------------|------|------|-------|----------------|
| Klc2          | Kinesin light chain 2                                                                     | 1.34 | Up   | 0.007 | NM_008451      |
| Ldb3          | LIM domain binding 3, transcript variant 2                                                | 1.34 | Down | 0.003 | NM_001039071.2 |
| Epdr1         | Ependymin related protein 1                                                               | 1.34 | Up   | 0.012 | NM_134065.2    |
| Slc11a2       | Solute carrier family 11 (proton-coupled divalent metal ion transporters), member 2       | 1.34 | Up   | 0.010 | AK049856       |
| Tmem129       | Transmembrane protein 129                                                                 | 1.34 | Down | 0.001 | NM_026698.2    |
| 1110001N06Rik | RIKEN cdna 1110001N06Rik gene                                                             | 1.34 | Down | 0.006 | AK003256       |
| D630035D13Rik | RIKEN cdna D630035D13Rik gene                                                             | 1.34 | Down | 0.000 | AK085493       |
| Fusip1        | FUS interacting protein (serine-arginine rich) 1, transcript variant 2                    | 1.34 | Down | 0.009 | NM_001080387.1 |
| Ing1          | Inhibitor of growth family, member 1                                                      | 1.34 | Down | 0.014 | NM_011919.4    |
| Abca15        | ATP-binding cassette, sub-family A (ABC1), member 15                                      | 1.34 | Up   | 0.006 | NM_177213.3    |
| LOC671348     | PREDICTED: similar to Peroxisome assembly protein 10                                      | 1.34 | Down | 0.010 | XM_992743.1    |
| E130309F12Rik | RIKEN cdna E130309F12 gene                                                                | 1.34 | Up   | 0.000 | NM_178756.2    |
| Mon1b         | MON1 homolog b (yeast), transcript variant 2                                              | 1.34 | Down | 0.007 | NM_001048143.1 |
| Luc7l2        | LUC7-like 2 (S. cerevisiae)                                                               | 1.33 | Down | 0.004 | NM_138680      |
| Dnmt3l        | DNA (cytosine-5-)-methyltransferase 3-like, transcript variant 2                          | 1.33 | Down | 0.001 | NM_001081695.1 |
| LOC672178     | PREDICTED: similar to ribosomal protein SA                                                | 1.33 | Down | 0.008 | XR_003738.1    |
| 2310039L15Rik | RIKEN cdna 2310039L15Rik gene                                                             | 1.33 | Up   | 0.009 | XM_290098.1    |
| H2-D1         | Histocompatibility 2, D region locus 1                                                    | 1.33 | Down | 0.004 | NM_010380.2    |
| Itga5         | Integrin alpha 5 (fibronectin receptor alpha)                                             | 1.33 | Down | 0.010 | NM_010577.2    |
| Pip5k2b       | PREDICTED: phosphatidylinositol-4-phosphate 5-kinase, type II, beta, transcript variant 4 | 1.33 | Up   | 0.003 | XM_991639.1    |
| 5830417C01Rik | RIKEN cdna 5830417C01 gene                                                                | 1.33 | Up   | 0.004 | NM_024282.3    |
| C230043G09Rik | RIKEN cdna C230043G09Rik gene                                                             | 1.33 | Up   | 0.000 | AK048752       |
| Sdownt6h      | Suppressor of Ty 6 homolog                                                                | 1.33 | Down | 0.002 | NM_009297      |
| Ptp4a2        | Protein tyrosine phosphatase 4a2                                                          | 1.33 | Up   | 0.003 | NM_008974.3    |
| Zfp288        | Zinc finger protein 288                                                                   | 1.33 | Down | 0.003 | AK034574       |
| Col11a2       | Procollagen, type XI, alpha 2                                                             | 1.33 | Up   | 0.006 | NM_009926.1    |
| D930024H10Rik | RIKEN cdna D930024H10Rik gene                                                             | 1.33 | Down | 0.010 | AK086373       |
| Prkcq         | Protein kinase C, theta                                                                   | 1.32 | Up   | 0.014 | NM_008859.2    |
| 1500032D16Rik | RIKEN cdna 1500032D16 gene                                                                | 1.32 | Down | 0.005 | NM_030087.1    |
| Stxbp2        | Syntaxin binding protein 2                                                                | 1.32 | Down | 0.011 | NM_011503.3    |
| Uqcrb         | Ubiquinol-cytochrome c reductase binding protein                                          | 1.32 | Down | 0.008 | AK017907       |
| D15Mit260     | DNA Segment, Chr 15 Massachusetts Institute of Technology 260                             | 1.32 | Down | 0.010 |                |
| Rnf26         | Ring finger protein 26                                                                    | 1.32 | Down | 0.012 | NM_153762.3    |
| Bscl2         | Bernardinelli-Seip congenital lipodystrophy 2 homolog                                     | 1.32 | Down | 0.011 | NM_008144.3    |
| Stk24         | Serine/threonine kinase 24 (STE20 homolog, yeast)                                         | 1.32 | Down | 0.014 | NM_145465.2    |
| Mgst1         | Microsomal glutathione S-transferase 1                                                    | 1.32 | Down | 0.011 | NM_019946.3    |
| Mia1          | Melanoma inhibitory activity 1                                                            | 1.32 | Down | 0.012 | NM_019394      |
| Cyp51         | Cytochrome P450, family 51                                                                | 1.32 | Down | 0.000 | NM_020010.2    |
| Cyb5          | Cytochrome b5                                                                             | 1.32 | Down | 0.006 | NM_025797      |
| LOC385506     | cDNA sequence LOC385506                                                                   | 1.32 | Down | 0.007 | XM_358256.1    |
| Ssbp2         | Single-stranded DNA binding protein 2                                                     | 1.32 | Up   | 0.012 | NM_024186.1    |
| Nr1h3         | Nuclear receptor subfamily 1, group H, member 3                                           | 1.32 | Down | 0.001 | NM_013839.2    |
| Sat1          | Spermidine/spermine N1-acetyl transferase 1                                               | 1.31 | Down | 0.007 | NM_009121.3    |
| Mg29          | Mitsugumin 29                                                                             | 1.31 | Down | 0.009 | AK052749       |
| Otub2         | OTU domain, ubiquitin aldehyde binding 2                                                  | 1.31 | Down | 0.000 | NM_026580.1    |

**SUPPLEMENTARY FIGURES FROM "Identification and validation of the pathways and functions regulated by the orphan nuclear receptor, ROR alpha, in skeletal muscle." S Raichur *et al***

|               |                                                                                   |      |      |       |                |
|---------------|-----------------------------------------------------------------------------------|------|------|-------|----------------|
| Pter          | Phosphotriesterase related                                                        | 1.31 | Down | 0.004 | NM_008961.2    |
| 1190008K20Rik | RIKEN cdna 1190008K20Rik gene                                                     | 1.31 | Down | 0.012 | AK028012       |
| 2310016C16Rik | RIKEN cdna 2310016C16 gene                                                        | 1.31 | Down | 0.005 | NM_027127.1    |
| Kif18a        | Kinesin family member 18A                                                         | 1.31 | Up   | 0.001 | NM_139303.1    |
| LOC433141     | PREDICTED: similar to 40S ribosomal protein SA (p40) (34/67 kda laminin receptor) | 1.31 | Down | 0.007 | XM_484667.3    |
| Ccdc134       | Coiled-coil domain containing 134                                                 | 1.31 | Down | 0.001 | NM_172428.2    |
| 9430025M13Rik | PREDICTED: RIKEN cdna 9430025M13 gene                                             | 1.31 | Down | 0.012 | XM_001001939.1 |
| 1700041B20Rik | RIKEN cdna 1700041B20Rik gene                                                     | 1.31 | Down | 0.013 | XM_485065      |
| Ntf3          | Neurotrophin 3                                                                    | 1.31 | Down | 0.014 | NM_008742.2    |
| Gstk1         | Glutathione S-transferase kappa 1                                                 | 1.31 | Down | 0.009 | NM_029555.2    |
| BC013481      | Cdna sequence BC013481                                                            | 1.31 | Down | 0.006 | NM_139065.1    |
| B3galnt2      | UDP-galnac:betaglcnac beta 1,3-galactosaminyltransferase, polypeptide 2           | 1.31 | Down | 0.002 | NM_178640.2    |
| Nfix          | Nuclear factor I/X, transcript variant 1,                                         | 1.31 | Down | 0.006 | NM_001081982.1 |
| Nqo2          | NAD(P)H dehydrogenase, quinone 2                                                  | 1.31 | Up   | 0.006 | NM_020282.2    |
| A530021P12Rik | RIKEN cdna A530021P12Rik gene                                                     | 1.31 | Down | 0.012 | AK040738       |
| E130006N16Rik | RIKEN cdna E130006N16Rik gene                                                     | 1.31 | Down | 0.001 |                |
| 2210015D19Rik | PREDICTED: RIKEN cdna 2210015D19 gene, transcript variant 5                       | 1.31 | Down | 0.007 | XM_900750.2    |
| Reep6         | Receptor accessory protein 6                                                      | 1.31 | Down | 0.005 | NM_139292.1    |
| Ihpk3         | Inositol hexaphosphate kinase 3                                                   | 1.31 | Down | 0.013 | NM_173027.1    |
| C230066K19Rik | RIKEN cdna C230066K19Rik gene                                                     | 1.31 | Down | 0.005 |                |
| Rai14         | Retinoic acid induced 14                                                          | 1.31 | Up   | 0.004 | NM_030690.2    |
| Parp6         | Poly (ADP-ribose) polymerase family, member 6                                     | 1.31 | Up   | 0.001 | NM_029922.2    |
| Pleckhg3      | Pleckstrin homology domain containing, family G (with rhogef domain) member 3     | 1.31 | Down | 0.013 | NM_153804.3    |
| Tex2          | Testis expressed gene 2                                                           | 1.31 | Up   | 0.009 | NM_198292.3    |
| 4833416J08Rik | RIKEN cdna 4833416J08Rik gene                                                     | 1.30 | Down | 0.001 |                |
| Mfge8         | Milk fat globule-EGF factor 8 protein                                             | 1.30 | Down | 0.009 | NM_008594.2    |
| Slc25a1       | Solute carrier family 25 (mitochondrial carrier, citrate transporter), member 1   | 1.30 | Down | 0.003 | NM_153150.1    |
| Saal1         | PREDICTED: serum amyloid A-like 1, transcript variant 2                           | 1.30 | Down | 0.006 | XM_001003894.1 |
| Eef1a1        | Eukaryotic translation elongation factor 1 alpha 1                                | 1.30 | Down | 0.009 | NM_010106.2    |
| H28           | Histocompatibility 28                                                             | 1.30 | Down | 0.004 | NM_031367.1    |
| BC044804      | cDNA sequence BC044804                                                            | 1.30 | Down | 0.001 | NM_178035      |
| Tex2          | Testis expressed gene 2                                                           | 1.30 | Up   | 0.000 | NM_198292.3    |
| 2810021O14Rik | RIKEN cdna 2810021O14Rik gene                                                     | 1.30 | Down | 0.010 | AK076679       |
| Tspan12       | Tetraspanin 12                                                                    | 1.30 | Down | 0.005 | NM_173007.1    |
| Ptpn4         | Protein tyrosine phosphatase, non-receptor type 4                                 | 1.30 | Down | 0.001 | NM_019933.2    |
| Mrpl15        | Mitochondrial ribosomal protein L15                                               | 1.30 | Down | 0.006 | AK003026       |

**SUPPLEMENTARY FIGURES FROM “Identification and validation of the pathways and functions regulated by the orphan nuclear receptor, ROR alpha, in skeletal muscle.” S Raichur *et al***



S3: Differentially expressed genes from the Illumina BeadArray analysis comparing Tg-ROR $\Delta$ DE to wildtype mice were analysed. P-values represent Fisher's Exact Test with the threshold at 0.05.

A)

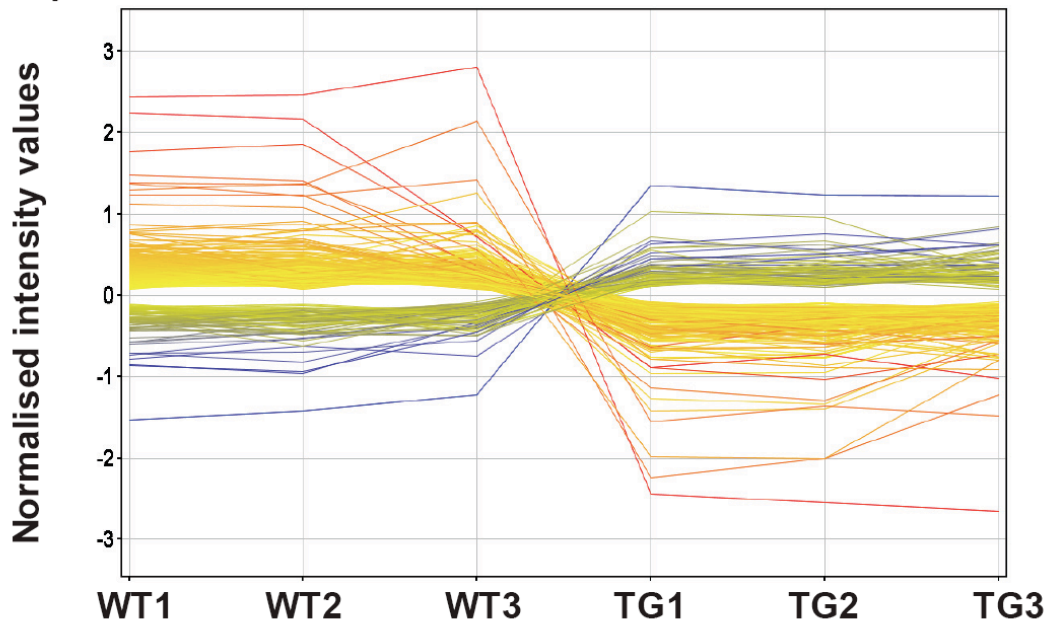

B)

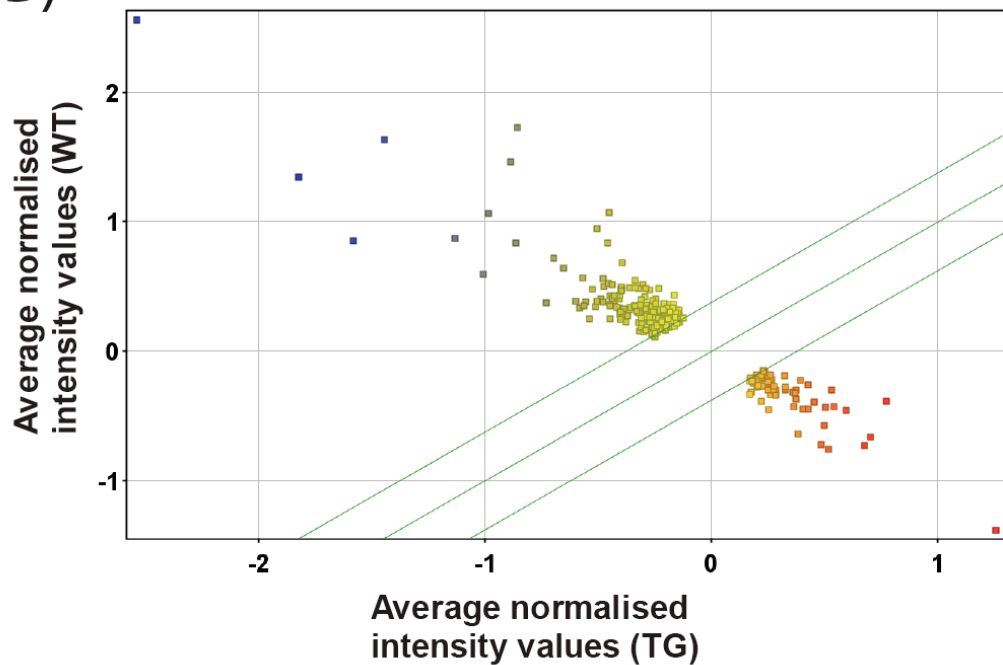

S4: Ingenuity pathway analysis of differentially expressed genes from the Illumina BeadArray analysis comparing Tg-ROR $\alpha$ DE to wild type mice to identify A, the top 20 functions and B, the top 20 pathways.

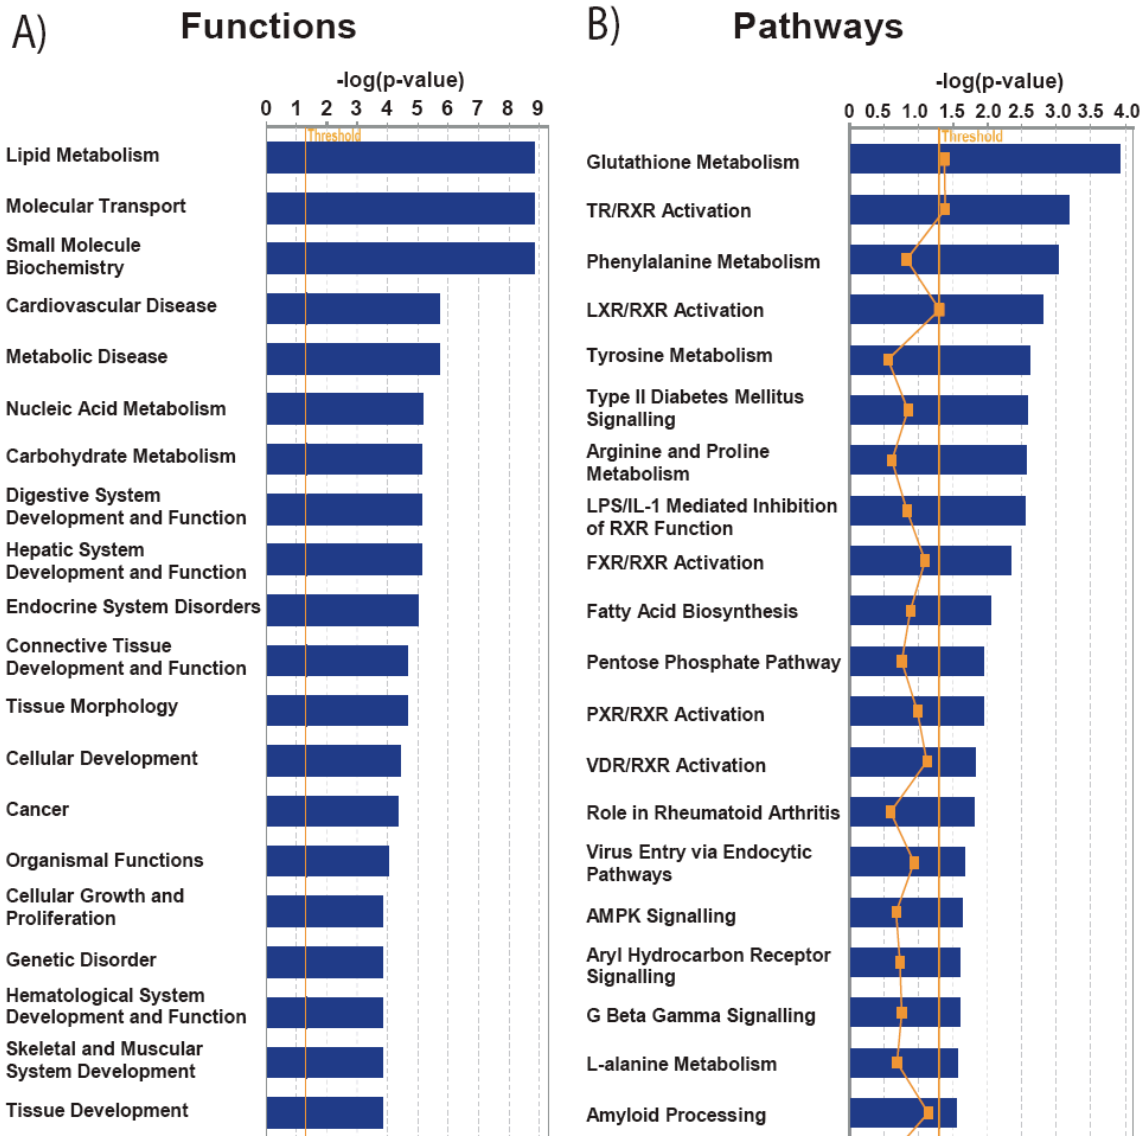

S5: Ingenuity pathway analysis of up and down regulated genes from the Illumina BeadArray analysis, comparing Tg-ROR $\Delta$ DE to wild type mice. A, functional annotation of genes regulated in ROR $\alpha$ 1 $\Delta$ DE that are associated with metabolism. B and C, the top 10 functional categories and pathways that were identified from down-regulated genes.

**A**

| Function Annotation     | Number of Reg. Genes | Regulated Genes                                                                                                                                                                                                                                                                                                                 |
|-------------------------|----------------------|---------------------------------------------------------------------------------------------------------------------------------------------------------------------------------------------------------------------------------------------------------------------------------------------------------------------------------|
| Lipid Metabolism        | 36                   | ↓ Acaca, ↓ Acs15, ↓ Adrp, ↓ Agpat2, ↓ Akt2, ↓ Apoc1, ↓ Atp5a1, ↓ Cebpa, ↓ Ces1, ↓ Cidea, ↓ Eef1a1, ↓ Ehhadh, ↓ Elovl6, ↓ Ephx2, ↓ Etfdh, ↓ Fasn, ↓ Gnao1, ↓ Got2, ↓ Hp, ↓ Hsd11b1, ↓ Idh1, ↓ Ihpk3, ↓ Lgals1, ↓ Mif, ↓ Nr1h3, ↓ Pdhb, ↓ Pparg, ↓ Prkar2b, ↓ Sat1, ↓ Scd, ↑ Slc22a4, ↓ Slc27a2, ↓ Thrsp, ↓ Tspo, ↓ Ucp1, ↓ Vldlr |
| Carbohydrate Metabolism | 23                   | ↓ Agpat2, ↓ Akt2, ↓ Apoc1, ↓ B3galnt2, ↓ Cebpa, ↓ Chst1, ↓ Idh1, ↓ Idh3b, ↓ Ihpk3, ↓ Kcnj11, ↑ Lgals1, ↓ Mif, ↑ Nans, ↓ Pfkf, ↓ Pparg, ↓ Ppp1r1a, ↓ Prkar2b, ↓ Pygl, ↓ Scd, ↑ St3gal2, ↑ Stab2, ↓ Tkt, ↓ Ucp1                                                                                                                   |

**B** Functional categories of down-regulated genes

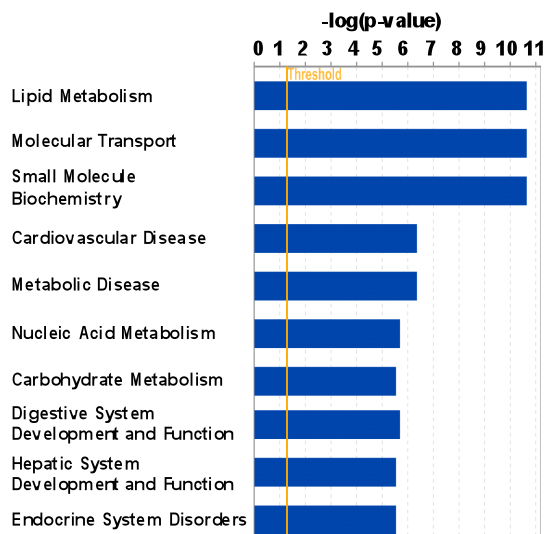

**C** Pathways associated with down-regulated genes

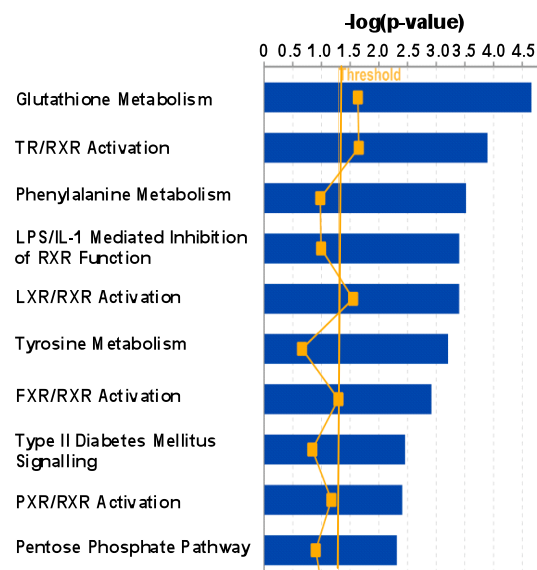

S6: Relative quantification of lipogenic gene expression in skeletal muscle of transgenic compared to wt littermate controls, normalized to 18S mRNA.

| Entrez gene symbol-TaqMan assay ID | $\Delta\Delta Ct$ | P. Value     | B. Value      | t. Value     | RQ. Log10     | RQ. Linear   | Significance       | adj. P.Val   | Significance FDR       |
|------------------------------------|-------------------|--------------|---------------|--------------|---------------|--------------|--------------------|--------------|------------------------|
| <b>Abca1-Mm00442646_m1</b>         | <b>0.628</b>      | <b>0.038</b> | <b>-4.081</b> | <b>2.283</b> | <b>-0.189</b> | <b>0.647</b> | <b>Significant</b> | <b>0.080</b> | <b>Non Significant</b> |
| Abcg1-Mm00437390_m1                | 0.099             | 0.760        | -6.337        | 0.311        | -0.030        | 0.933        | Non Significant    | 0.802        | Non Significant        |
| Acadm-Mm00431611_m1                | 0.269             | 0.506        | -6.149        | 0.682        | -0.081        | 0.830        | Non Significant    | 0.565        | Non Significant        |
| <b>Acsl4-Mm00490331_m1</b>         | <b>1.396</b>      | <b>0.001</b> | <b>-0.313</b> | <b>4.273</b> | <b>-0.420</b> | <b>0.380</b> | <b>Significant</b> | <b>0.012</b> | <b>Significant</b>     |
| Apoe-Mm00437573_m1                 | 0.483             | 0.103        | -4.963        | 1.739        | -0.146        | 0.715        | Non Significant    | 0.140        | Non Significant        |
| Cav1-Mm00483057_m1                 | 0.718             | 0.073        | -4.666        | 1.932        | -0.216        | 0.608        | Non Significant    | 0.115        | Non Significant        |
| <b>Cav3-Mm01182632_m1</b>          | <b>0.452</b>      | <b>0.043</b> | <b>-4.190</b> | <b>2.220</b> | <b>-0.136</b> | <b>0.731</b> | <b>Significant</b> | <b>0.081</b> | <b>Non Significant</b> |
| <b>Cd36-Mm00432403_m1</b>          | <b>1.115</b>      | <b>0.013</b> | <b>-3.121</b> | <b>2.814</b> | <b>-0.335</b> | <b>0.462</b> | <b>Significant</b> | <b>0.042</b> | <b>Significant</b>     |
| Cebpa-Mm00514283_s1                | 0.055             | 0.878        | -6.374        | 0.156        | -0.016        | 0.963        | Non Significant    | 0.878        | Non Significant        |
| <b>Cebpb-Mm00843434_s1</b>         | <b>0.908</b>      | <b>0.023</b> | <b>-3.614</b> | <b>2.546</b> | <b>-0.273</b> | <b>0.533</b> | <b>Significant</b> | <b>0.061</b> | <b>Non Significant</b> |
| <b>Cebpd-Mm00786711_s1</b>         | <b>1.086</b>      | <b>0.029</b> | <b>-3.827</b> | <b>2.428</b> | <b>-0.327</b> | <b>0.471</b> | <b>Significant</b> | <b>0.068</b> | <b>Non Significant</b> |
| Fabp4-Mm00445880_m1                | 0.721             | 0.089        | -4.842        | 1.819        | -0.217        | 0.606        | Non Significant    | 0.130        | Non Significant        |
| <b>Fasn-Mm00662319_m1</b>          | <b>1.844</b>      | <b>0.005</b> | <b>-2.163</b> | <b>3.316</b> | <b>-0.555</b> | <b>0.279</b> | <b>Significant</b> | <b>0.023</b> | <b>Significant</b>     |
| <b>Hif1a-Mm00468875_m1</b>         | <b>0.797</b>      | <b>0.013</b> | <b>-3.082</b> | <b>2.834</b> | <b>-0.240</b> | <b>0.575</b> | <b>Significant</b> | <b>0.042</b> | <b>Significant</b>     |
| <b>Scd1-Mm00772290_m1</b>          | <b>2.099</b>      | <b>0.001</b> | <b>-0.881</b> | <b>3.978</b> | <b>-0.632</b> | <b>0.233</b> | <b>Significant</b> | <b>0.012</b> | <b>Significant</b>     |
| Scd2-Mm00485951_g1                 | 0.413             | 0.208        | -5.538        | 1.317        | -0.124        | 0.751        | Non Significant    | 0.264        | Non Significant        |
| Ski-Mm00448744_m1                  | 0.249             | 0.256        | -5.695        | 1.182        | -0.075        | 0.841        | Non Significant    | 0.304        | Non Significant        |
| Skil-Mm00456917_m1                 | 0.543             | 0.065        | -4.572        | 1.991        | -0.164        | 0.686        | Non Significant    | 0.113        | Non Significant        |
| <b>Srebf1-Mm00550338_m1</b>        | <b>0.764</b>      | <b>0.004</b> | <b>-2.034</b> | <b>3.383</b> | <b>-0.230</b> | <b>0.589</b> | <b>Significant</b> | <b>0.023</b> | <b>Significant</b>     |
| Npy-Mm00445771_m1                  | 1.707             | 0.683        | -6.225        | 0.419        | -0.514        | 0.306        | Non Significant    | 0.777        | Non Significant        |
| Npy2r-Mm01956783_s1                | -7.241            | 0.244        | -5.569        | -1.230       | 2.180         | 151.272      | Non Significant    | 0.366        | Non Significant        |

Significance was assigned by the application of the Empirical Bayes statistic. RQ – Relative quantification, FDR – False detection rate.

S7: Relative quantification of NR gene expression in skeletal muscle of transgenic compared to wt littermate controls, normalized to *gusB*, *hprt1*, and *gapdh*.

| Entrez gene symbol-TaqMan assay ID | $\Delta\Delta Ct$ | P. Value     | B. Value      | t. Value     | RQ. Log10     | RQ. Linear   | Significance       | adj. P.Val   | Significance FDR |
|------------------------------------|-------------------|--------------|---------------|--------------|---------------|--------------|--------------------|--------------|------------------|
| Ar-Mm00442688_m1                   | 0.304             | 0.469        | -5.520        | 0.766        | -0.091        | 0.810        | N.S.               | 0.776        | N.S.             |
| Esr1-Mm00433149_m1                 | 0.490             | 0.147        | -4.657        | 1.630        | -0.148        | 0.712        | N.S.               | 0.705        | N.S.             |
| Esr2-Mm00599819_m1                 | -0.908            | 0.299        | -5.214        | -1.122       | 0.273         | 1.877        | N.S.               | 0.776        | N.S.             |
| Esrra-Mm00433143_m1                | 0.031             | 0.936        | -5.809        | 0.083        | -0.009        | 0.979        | N.S.               | 0.956        | N.S.             |
| Esrrb-Mm00442411_m1                | 0.452             | 0.247        | -5.070        | 1.264        | -0.136        | 0.731        | N.S.               | 0.776        | N.S.             |
| Esrrg-Mm00516267_m1                | 0.516             | 0.110        | -4.414        | 1.829        | -0.155        | 0.699        | N.S.               | 0.659        | N.S.             |
| Hnf4a-Mm00433964_m1                | -6.271            | 0.169        | -4.770        | -1.534       | 1.888         | 77.243       | N.S.               | 0.736        | N.S.             |
| Hnf4g-Mm00443563_m1                | -3.485            | 0.575        | -5.638        | -0.587       | 1.049         | 11.194       | N.S.               | 0.789        | N.S.             |
| Nr0b1-Mm00431729_m1                | -2.294            | 0.677        | -5.716        | -0.434       | 0.691         | 4.905        | N.S.               | 0.831        | N.S.             |
| Nr0b2-Mm00442278_m1                | -0.389            | 0.752        | -5.757        | -0.328       | 0.117         | 1.310        | N.S.               | 0.831        | N.S.             |
| Nr1d1-Mm00520708_m1                | 0.392             | 0.461        | -5.510        | 0.780        | -0.118        | 0.762        | N.S.               | 0.776        | N.S.             |
| Nr1d2-Mm00441730_m1                | 0.166             | 0.547        | -5.611        | 0.632        | -0.050        | 0.891        | N.S.               | 0.789        | N.S.             |
| Nr1h2-Mm00437262_m1                | -0.275            | 0.349        | -5.325        | -1.004       | 0.083         | 1.210        | N.S.               | 0.776        | N.S.             |
| <b>Nr1h3-Mm00443454_m1</b>         | <b>0.814</b>      | <b>0.039</b> | <b>-3.531</b> | <b>2.522</b> | <b>-0.245</b> | <b>0.569</b> | <b>Significant</b> | <b>0.393</b> | <b>N.S.</b>      |
| Nr1h4-Mm00436419_m1                | 0.494             | 0.411        | -5.436        | 0.875        | -0.149        | 0.710        | N.S.               | 0.776        | N.S.             |
| Nr1h5-Mm01308716_m1                | -1.083            | 0.834        | -5.789        | -0.217       | 0.326         | 2.118        | N.S.               | 0.883        | N.S.             |
| Nr1i2-Mm00803092_m1                | -7.720            | 0.108        | -4.399        | -1.841       | 2.324         | 210.800      | N.S.               | 0.659        | N.S.             |
| Nr1i3-Mm00437986_m1                | -2.887            | 0.356        | -5.340        | -0.987       | 0.869         | 7.397        | N.S.               | 0.776        | N.S.             |
| <b>Nr2c1-Mm00449123_m1</b>         | <b>0.601</b>      | <b>0.032</b> | <b>-3.353</b> | <b>2.661</b> | <b>-0.181</b> | <b>0.659</b> | <b>Significant</b> | <b>0.393</b> | <b>N.S.</b>      |
| Nr2e1-Mm00455855_m1                | 1.112             | 0.846        | -5.792        | 0.201        | -0.335        | 0.463        | N.S.               | 0.883        | N.S.             |
| Nr2e3-Mm00443299_m1                | -0.963            | 0.415        | -5.443        | -0.866       | 0.290         | 1.949        | N.S.               | 0.776        | N.S.             |
| Nr2f1-Mm00657937_m1                | -0.262            | 0.564        | -5.627        | -0.605       | 0.079         | 1.199        | N.S.               | 0.789        | N.S.             |
| Nr2f2-Mm00772789_m1                | 0.146             | 0.609        | -5.667        | 0.534        | -0.044        | 0.904        | N.S.               | 0.813        | N.S.             |
| Nr2f6-Mm00438762_m1                | -0.081            | 0.762        | -5.762        | -0.315       | 0.024         | 1.058        | N.S.               | 0.831        | N.S.             |
| <b>Nr3c1-Mm00433832_m1</b>         | <b>0.912</b>      | <b>0.005</b> | <b>-1.734</b> | <b>4.037</b> | <b>-0.275</b> | <b>0.531</b> | <b>Significant</b> | <b>0.234</b> | <b>N.S.</b>      |
| Nr3c2-Mm01241595_m1                | 0.188             | 0.640        | -5.691        | 0.488        | -0.057        | 0.878        | N.S.               | 0.821        | N.S.             |
| Nr4a1-Mm00439358_m1                | -0.443            | 0.557        | -5.621        | -0.616       | 0.133         | 1.359        | N.S.               | 0.789        | N.S.             |
| Nr4a2-Mm00443056_m1                | -0.037            | 0.962        | -5.812        | -0.049       | 0.011         | 1.026        | N.S.               | 0.962        | N.S.             |
| Nr4a3-Mm00450074_m1                | -2.220            | 0.335        | -5.296        | -1.035       | 0.668         | 4.657        | N.S.               | 0.776        | N.S.             |
| Nr5a1-Mm00446826_m1                | 0.211             | 0.423        | -5.456        | 0.850        | -0.064        | 0.864        | N.S.               | 0.776        | N.S.             |
| Nr5a2-Mm00446088_m1                | 0.642             | 0.732        | -5.748        | 0.356        | -0.193        | 0.641        | N.S.               | 0.831        | N.S.             |
| Nr6a1-Mm00599848_m1                | 0.341             | 0.274        | -5.150        | 1.186        | -0.103        | 0.790        | N.S.               | 0.776        | N.S.             |
| Pgr-Mm00435625_m1                  | -3.825            | 0.437        | -5.476        | -0.824       | 1.152         | 14.176       | N.S.               | 0.776        | N.S.             |
| Ppara-Mm00440939_m1                | 0.273             | 0.572        | -5.635        | 0.592        | -0.082        | 0.828        | N.S.               | 0.789        | N.S.             |
| <b>Ppard-Mm00803186_g1</b>         | <b>0.926</b>      | <b>0.041</b> | <b>-3.564</b> | <b>2.496</b> | <b>-0.279</b> | <b>0.526</b> | <b>Significant</b> | <b>0.393</b> | <b>N.S.</b>      |
| Pparg-Mm00440945_m1                | -0.322            | 0.501        | -5.561        | -0.708       | 0.097         | 1.250        | N.S.               | 0.789        | N.S.             |
| Rara-Mm00436264_m1                 | 0.319             | 0.356        | -5.340        | 0.987        | -0.096        | 0.801        | N.S.               | 0.776        | N.S.             |
| Rarb-Mm01319676_m1                 | -0.189            | 0.726        | -5.744        | -0.365       | 0.057         | 1.140        | N.S.               | 0.831        | N.S.             |
| Rarg-Mm00441083_m1                 | 0.590             | 0.208        | -4.938        | 1.386        | -0.177        | 0.665        | N.S.               | 0.776        | N.S.             |
| Rora-Mm00443103_m1                 | 0.260             | 0.445        | -5.489        | 0.809        | -0.078        | 0.835        | N.S.               | 0.776        | N.S.             |
| Rorb-Mm00524993_m1                 | 3.784             | 0.141        | -4.626        | 1.655        | -1.139        | 0.073        | N.S.               | 0.705        | N.S.             |
| <b>Rorc-Mm00441139_m1</b>          | <b>0.860</b>      | <b>0.019</b> | <b>-2.911</b> | <b>3.013</b> | <b>-0.259</b> | <b>0.551</b> | <b>Significant</b> | <b>0.393</b> | <b>N.S.</b>      |
| Rxra-Mm00441182_m1                 | 0.559             | 0.068        | -4.001        | 2.156        | -0.168        | 0.679        | N.S.               | 0.542        | N.S.             |
| Rxrb-Mm00441193_m1                 | 0.130             | 0.650        | -5.698        | 0.474        | -0.039        | 0.914        | N.S.               | 0.821        | N.S.             |
| Rxrg-Mm00436410_m1                 | 0.118             | 0.731        | -5.747        | 0.358        | -0.035        | 0.922        | N.S.               | 0.831        | N.S.             |
| Thra-Mm00617505_m1                 | 0.962             | 0.322        | -5.269        | 1.065        | -0.290        | 0.513        | N.S.               | 0.776        | N.S.             |
| Thrb-Mm00437044_m1                 | -0.326            | 0.441        | -5.483        | -0.816       | 0.098         | 1.254        | N.S.               | 0.776        | N.S.             |
| Vdr-Mm00437297_m1                  | 0.595             | 0.400        | -5.419        | 0.896        | -0.179        | 0.662        | N.S.               | 0.776        | N.S.             |

RQ – Relative quantification, FDR – False detection rate. Significance was assigned by the application of the Empirical Bayes statistic.

**SUPPLEMENTARY FIGURES FROM “Identification and validation of the pathways and functions regulated by the orphan nuclear receptor, ROR alpha, in skeletal muscle.” S Raichur *et al***

S8: Relative quantification of glucose homeostatic gene expression in skeletal muscle of transgenic compared to wt littermate controls, normalized to 18S mRNA.

| Entrez gene symbol-TaqMan assay ID | $\Delta\Delta Ct$ | P. Value | B. Value | t. Value | RQ. Log10 | RQ. Linear | Significance    | adj. P.Val | Significance FDR |
|------------------------------------|-------------------|----------|----------|----------|-----------|------------|-----------------|------------|------------------|
| Akt2-Mm00545827_m1                 | 1.684             | 0.001    | -0.621   | 4.337    | -0.507    | 0.311      | Significant     | 0.037      | Significant      |
| Cs- Mm00466043_m1                  | 0.515             | 0.011    | -2.781   | 3.061    | -0.155    | 0.700      | Significant     | 0.087      | Non Significant  |
| Foxo1-Mm00490672_m1                | 1.229             | 0.042    | -4.074   | 2.295    | -0.370    | 0.427      | Significant     | 0.173      | Non Significant  |
| Gys1-Mm00472712_m1                 | 0.320             | 0.161    | -5.260   | 1.500    | -0.096    | 0.801      | Non Significant | 0.372      | Non Significant  |
| Hk2-Mm00443385_m1                  | 0.574             | 0.082    | -4.678   | 1.911    | -0.173    | 0.672      | Non Significant | 0.225      | Non Significant  |
| lfng-Mm00801778_m1                 | 0.534             | 0.913    | -6.333   | 0.112    | -0.161    | 0.691      | Non Significant | 0.961      | Non Significant  |
| Il15-Mm00434210_m1                 | 1.076             | 0.026    | -3.634   | 2.561    | -0.324    | 0.474      | Significant     | 0.132      | Non Significant  |
| Il6- Mm00446190_m1                 | 0.150             | 0.788    | -6.300   | 0.275    | -0.045    | 0.902      | Non Significant | 0.929      | Non Significant  |
| Insr- Mm00439693_m1                | 0.110             | 0.581    | -6.172   | 0.568    | -0.033    | 0.927      | Non Significant | 0.710      | Non Significant  |
| Irs1- Mm00439720_s1                | -0.185            | 0.403    | -5.955   | -0.868   | 0.056     | 1.137      | Non Significant | 0.559      | Non Significant  |
| Lep- Mm00434759_m1                 | -0.193            | 0.955    | -6.338   | -0.058   | 0.058     | 1.143      | Non Significant | 0.961      | Non Significant  |
| Lepr-Mm00440181_m1                 | 1.173             | 0.009    | -2.664   | 3.129    | -0.353    | 0.443      | Significant     | 0.087      | Non Significant  |
| Lipe-Mm00495359_m1                 | 0.438             | 0.180    | -5.353   | 1.429    | -0.132    | 0.738      | Non Significant | 0.372      | Non Significant  |
| Pck1-Mm00440636_m1                 | 0.905             | 0.271    | -5.674   | 1.157    | -0.272    | 0.534      | Non Significant | 0.497      | Non Significant  |
| Pdk1-Mm00554306_m1                 | 0.284             | 0.356    | -5.872   | 0.962    | -0.085    | 0.822      | Non Significant | 0.556      | Non Significant  |
| Pdk2-Mm00446681_m1                 | 0.034             | 0.883    | -6.328   | 0.150    | -0.010    | 0.977      | Non Significant | 0.961      | Non Significant  |
| Pdk3-Mm00455220_m1                 | 1.071             | 0.028    | -3.703   | 2.520    | -0.323    | 0.476      | Significant     | 0.132      | Non Significant  |
| Pdk4-Mm00443325_m1                 | 0.887             | 0.018    | -3.293   | 2.763    | -0.267    | 0.541      | Significant     | 0.119      | Non Significant  |
| Pfkm-Mm00445461_m1                 | 0.167             | 0.264    | -5.653   | 1.176    | -0.050    | 0.890      | Non Significant | 0.497      | Non Significant  |
| Pnpla2-Mm00503040_m1               | 0.730             | 0.072    | -4.571   | 1.981    | -0.220    | 0.603      | Non Significant | 0.220      | Non Significant  |
| Ptgs2-Mm00478374_m1                | 0.346             | 0.500    | -6.090   | 0.696    | -0.104    | 0.787      | Non Significant | 0.644      | Non Significant  |
| Pygm-Mm00478582_m1                 | 0.286             | 0.174    | -5.324   | 1.451    | -0.086    | 0.820      | Non Significant | 0.372      | Non Significant  |
| Rab18-Mm00441057_m1                | 0.299             | 0.115    | -4.977   | 1.708    | -0.090    | 0.813      | Non Significant | 0.292      | Non Significant  |
| Rock1-Mm00485745_m1                | 0.202             | 0.406    | -5.960   | 0.862    | -0.061    | 0.869      | Non Significant | 0.559      | Non Significant  |
| Rock2-Mm00485761_m1                | 0.319             | 0.349    | -5.856   | 0.978    | -0.096    | 0.801      | Non Significant | 0.556      | Non Significant  |
| Slc2a2-Mm00446224_m1               | 1.283             | 0.825    | -6.313   | 0.227    | -0.386    | 0.411      | Non Significant | 0.939      | Non Significant  |
| Slc2a4-Mm00436615_m1               | 0.347             | 0.061    | -4.414   | 2.083    | -0.105    | 0.786      | Non Significant | 0.220      | Non Significant  |
| Slc2a8-Mm00444634_m1               | 0.231             | 0.318    | -5.790   | 1.046    | -0.070    | 0.852      | Non Significant | 0.551      | Non Significant  |
| Socs3-Mm00545913_s1                | -0.027            | 0.961    | -6.339   | -0.050   | 0.008     | 1.019      | Non Significant | 0.961      | Non Significant  |
| Stat3-Mm00456961_m1                | 0.172             | 0.507    | -6.098   | 0.685    | -0.052    | 0.887      | Non Significant | 0.644      | Non Significant  |
| Stat5b-Mm00839889_m1               | 0.892             | 0.003    | -1.646   | 3.723    | -0.269    | 0.539      | Significant     | 0.053      | Non Significant  |
| Tcf7l2-Mm00501505_m1               | 0.185             | 0.370    | -5.898   | 0.933    | -0.056    | 0.880      | Non Significant | 0.556      | Non Significant  |
| Tsc22d3-Mm00726417_s1              | 1.085             | 0.073    | -4.580   | 1.976    | -0.326    | 0.472      | Non Significant | 0.220      | Non Significant  |

Significance was assigned by the application of the Empirical Bayes statistic. RQ – Relative quantification, FDR – False detection rate.

Note: Glut1 mRNA expression performed independently by qPCR. RQ= 0.6219, Non Significant

**SUPPLEMENTARY FIGURES FROM “Identification and validation of the pathways and functions regulated by the orphan nuclear receptor, ROR alpha, in skeletal muscle.” S Raichur *et al***

S9: Table of Relative quantification of myogenic gene expression in skeletal muscle of transgenic compared to wt littermate controls, normalized to 18S mRNA.

| Entrez gene symbol-<br>TaQMan assay ID | $\Delta\Delta Ct$ | P. Value     | B. Value      | t. Value     | RQ. Log10     | RQ. Linear   | Significance       | adj. P.Val   | Significance FDR       |
|----------------------------------------|-------------------|--------------|---------------|--------------|---------------|--------------|--------------------|--------------|------------------------|
| Acvr1-Mm00431645_m1                    | 0.288             | 0.304        | -5.735        | 1.078        | -0.087        | 0.819        | Non Significant    | 0.418        | Non Significant        |
| <b>Acvr2a-Mm00431657_m1</b>            | <b>0.616</b>      | <b>0.029</b> | <b>-3.719</b> | <b>2.502</b> | <b>-0.185</b> | <b>0.653</b> | <b>Significant</b> | <b>0.123</b> | <b>Non Significant</b> |
| Acvr2b-Mm00431664_m1                   | -0.009            | 0.968        | -6.316        | -0.040       | 0.003         | 1.006        | Non Significant    | 0.968        | Non Significant        |
| Bhlhb2-Mm00478593_m1                   | -0.115            | 0.819        | -6.288        | -0.235       | 0.035         | 1.083        | Non Significant    | 0.872        | Non Significant        |
| Gdf10-Mm00521349_m1                    | 0.650             | 0.148        | -5.170        | 1.552        | -0.196        | 0.637        | Non Significant    | 0.288        | Non Significant        |
| <b>Gdf8-Mm00440328_m1</b>              | <b>0.888</b>      | <b>0.047</b> | <b>-4.155</b> | <b>2.234</b> | <b>-0.267</b> | <b>0.540</b> | <b>Significant</b> | <b>0.141</b> | <b>Non Significant</b> |
| Hdac4-Mm01304741_m1                    | 7.002             | 0.402        | -5.930        | 0.871        | -2.108        | 0.008        | Non Significant    | 0.498        | Non Significant        |
| <b>Hdac5-Mm00515917_m1</b>             | <b>0.599</b>      | <b>0.001</b> | <b>-0.721</b> | <b>4.283</b> | <b>-0.180</b> | <b>0.660</b> | <b>Significant</b> | <b>0.026</b> | <b>Significant</b>     |
| Hdac7a-Mm00469520_m1                   | 0.281             | 0.172        | -5.291        | 1.460        | -0.085        | 0.823        | Non Significant    | 0.308        | Non Significant        |
| <b>Mef2a-Mm00488969_m1</b>             | <b>0.397</b>      | <b>0.042</b> | <b>-4.061</b> | <b>2.293</b> | <b>-0.119</b> | <b>0.760</b> | <b>Significant</b> | <b>0.140</b> | <b>Non Significant</b> |
| Mef2c-Mm00600423_m1                    | -0.078            | 0.734        | -6.253        | -0.349       | 0.023         | 1.055        | Non Significant    | 0.807        | Non Significant        |
| <b>Mef2d-Mm00504929_m1</b>             | <b>0.499</b>      | <b>0.021</b> | <b>-3.398</b> | <b>2.693</b> | <b>-0.150</b> | <b>0.708</b> | <b>Significant</b> | <b>0.114</b> | <b>Non Significant</b> |
| Myod1-Mm00440387_m1                    | 0.094             | 0.876        | -6.303        | 0.160        | -0.028        | 0.937        | Non Significant    | 0.903        | Non Significant        |
| Myog-Mm00446194_m1                     | -0.279            | 0.548        | -6.118        | -0.619       | 0.084         | 1.214        | Non Significant    | 0.646        | Non Significant        |
| Ski- Mm00448744_m1                     | 0.249             | 0.141        | -5.125        | 1.585        | -0.075        | 0.841        | Non Significant    | 0.288        | Non Significant        |
| Skil- Mm00456917_m1                    | 0.536             | 0.060        | -4.379        | 2.094        | -0.161        | 0.690        | Non Significant    | 0.165        | Non Significant        |
| <b>Smad1-Mm00484721_m1</b>             | <b>0.503</b>      | <b>0.034</b> | <b>-3.847</b> | <b>2.424</b> | <b>-0.151</b> | <b>0.706</b> | <b>Significant</b> | <b>0.123</b> | <b>Non Significant</b> |
| <b>Smad2-Mm00487530_m1</b>             | <b>0.701</b>      | <b>0.011</b> | <b>-2.793</b> | <b>3.050</b> | <b>-0.211</b> | <b>0.615</b> | <b>Significant</b> | <b>0.087</b> | <b>Non Significant</b> |
| Smad3-Mm00489637_m1                    | 0.311             | 0.407        | -5.938        | 0.861        | -0.094        | 0.806        | Non Significant    | 0.498        | Non Significant        |
| Smad4-Mm00484724_m1                    | 0.249             | 0.294        | -5.710        | 1.102        | -0.075        | 0.841        | Non Significant    | 0.418        | Non Significant        |
| Smad6-Mm00484738_m1                    | 0.446             | 0.087        | -4.714        | 1.874        | -0.134        | 0.734        | Non Significant    | 0.192        | Non Significant        |
| Smad7-Mm00484741_m1                    | -0.371            | 0.237        | -5.548        | -1.250       | 0.112         | 1.294        | Non Significant    | 0.366        | Non Significant        |
| Smurf1-Mm00547102_m1                   | 0.455             | 0.178        | -5.318        | 1.439        | -0.137        | 0.730        | Non Significant    | 0.308        | Non Significant        |
| Tcf7l2-Mm00501505_m1                   | 0.185             | 0.362        | -5.859        | 0.951        | -0.056        | 0.880        | Non Significant    | 0.478        | Non Significant        |
| <b>Tgfr1-Mm00436971_m1</b>             | <b>1.296</b>      | <b>0.002</b> | <b>-0.925</b> | <b>4.157</b> | <b>-0.390</b> | <b>0.407</b> | <b>Significant</b> | <b>0.026</b> | <b>Significant</b>     |
| <b>Tgfr2-Mm00436978_m1</b>             | <b>0.675</b>      | <b>0.013</b> | <b>-2.977</b> | <b>2.941</b> | <b>-0.203</b> | <b>0.626</b> | <b>Significant</b> | <b>0.087</b> | <b>Non Significant</b> |
| Tnni1-Mm00502426_m1                    | 1.886             | 0.232        | -5.531        | 1.264        | -0.568        | 0.271        | Non Significant    | 0.366        | Non Significant        |
| <b>Tnni2-Mm00437157_g1</b>             | <b>0.510</b>      | <b>0.009</b> | <b>-2.561</b> | <b>3.185</b> | <b>-0.154</b> | <b>0.702</b> | <b>Significant</b> | <b>0.087</b> | <b>Non Significant</b> |

Significance was assigned by the application of the Empirical Bayes statistic. RQ – Relative quantification, FDR – False detection rate.
